1 **Monoterpenes alter TAR1-driven physiology in *Drosophila* species**

2

3 Running title: Monoterpenes modulate behaviour via TAR1

4

5 Luca Finetti<sup>1</sup>, Lasse Tiedemann<sup>2</sup>, Xiaoying Zhang<sup>2</sup>, Stefano Civolani<sup>3</sup>, Giovanni Bernacchia<sup>1\*</sup> &  
6 Thomas Roeder<sup>2-4\*</sup>

7

8 <sup>1</sup>Department of Life Sciences and Biotechnology, University of Ferrara, Ferrara, Italy; <sup>2</sup>Laboratory  
9 of Molecular Physiology, Department of Zoology, Kiel University, Kiel, Germany; <sup>3</sup>InnovaRicerca  
10 s.r.l. Monestirolo, Ferrara, Italy; <sup>4</sup>German Center for Lung Research (DZL), Airway Research  
11 Center North (ARCN), Kiel, Germany.

12

13 \*Co-corresponding authors:

14 Giovanni Bernacchia, Department of Life Sciences and Biotechnology, University of Ferrara, via  
15 Luigi Borsari 46, Ferrara, Italy. Tel (+39) 0532 455784 bhg@unife.it

16

17 Thomas Roeder, Department of Zoology, University of Kiel, Botanischen Garten 1-9, 24118 Kiel,  
18 Germany. Tel (+49) 431 880 4181 troeder@zoologie.uni-kiel.de

19

20

21

22

23

24

25

26

27

28

29

30

31

32

33

34

35 **Abstract**

36 Monoterpenes are molecules with insecticide properties whose mechanism of action is however not  
37 completely elucidated. Furthermore, they seem to be able to modulate the monoaminergic system  
38 and several behavioural aspects in insects. In particular, tyramine (TA) and octopamine (OA) and  
39 their associated receptors orchestrate physiological processes such as feeding, locomotion and  
40 metabolism. Here we show that monoterpenes not only act as biopesticides in *Drosophila* species  
41 but can cause complex behavioural alterations that require a functional type 1 tyramine receptors  
42 (TAR1s). Variations in metabolic traits as well as locomotory activity were evaluated in both  
43 *Drosophila suzukii* and *Drosophila melanogaster* after treatment with three monoterpenes. A  
44 TAR1<sup>-/-</sup> *D. melanogaster* strain was used to better understand the relationships between the receptor  
45 and monoterpenes-related behavioural changes. Immunohistochemistry analysis revealed that, in  
46 the *D. melanogaster* brain, TAR1 appeared to be expressed in areas controlling metabolism. In  
47 comparison to the *D. melanogaster* wild type, the TAR<sup>-/-</sup> flies showed a phenotype characterized by  
48 higher triglyceride levels and food intake as well as lower locomotory activity. The monoterpenes,  
49 tested at sublethal concentrations, were able to induce a downregulation of the TAR1 coding gene  
50 in both *Drosophila* species. Furthermore, monoterpenes also altered the behaviour in *D. suzukii* and  
51 *D. melanogaster* wild types 24 h after a continuous monoterpene exposure. Interestingly, they were  
52 ineffective in modifying the physiological performances of TAR1<sup>-/-</sup> flies. In conclusion, it appears  
53 that monoterpenes not only act as biopesticides for *Drosophila* but they can also interfere with its  
54 behaviour and metabolism in a TAR1-dependent fashion.

55

56 Keywords: *Drosophila*, Monoterpenes, Tyramine receptor, Metabolism, Behaviour

57

58

59

60

61

62

63

64

65

66

67

68

## 69 **Introduction**

70 *Drosophila suzukii* Matsumura (Diptera: Drosophilidae), commonly known as “Spotted Wing  
71 *Drosophila*”, is one of the few Drosophilidae that can lay its eggs on healthy fruits before they  
72 becomes fully ripe (Walsh et al., 2011; Lee et al., 2011). *D. suzukii* is able to infest most of the fruit  
73 and vine species worldwide with a particular preference for small fruits (Rota-Stabelli et al., 2013).  
74 This species causes serious damages to the horticultural economy especially in South-East Asia and  
75 its presence has been recently reported also in North America and Europe (Asplen et al., 2015).  
76 Moreover, *D. suzukii* can spread rapidly (seven to fifteen generations - year) and has a remarkable  
77 ability to adapt to different climatic conditions and host plants (Cini et al., 2012). Chemical  
78 pesticides are the main *D. suzukii* control agents, but they need frequent enforcements due to the  
79 numerous generations that occur during one crop season. Nonetheless, repetitive treatments may  
80 increase resistance development and have a negative impact on beneficial insects (Desneux et al.,  
81 2007; Haviland & Beers, 2012). Alternative and more sustainable control strategies are constantly  
82 under investigation (Schetelig et al., 2017). Currently, research on the biology, genetics, as well as  
83 physiology of *D. suzukii* has gained interest in order to develop new tools for a more effective and  
84 environmentally sensitive pest management. Essential oils (EOs) as botanical pesticides are among  
85 the most promising pest control methods for future applications. In fact, studies performed in the  
86 last decade showed that pesticides based on plant essential oils and their constituents (terpenes) are  
87 effective against a large number of insects (Bakkali et al., 2008; Isman, 2020). Members of the  
88 Drosophilidae family, *D. suzukii* included, are particularly sensitive to EO based pesticides (Park et  
89 al., 2016, Kim et al., 2016; Zhang et al., 2016; Dam et al., 2019). Most of EOs are complex  
90 mixtures of two predominant classes of molecules, terpenes and phenylpropanoids (Regnault-Roger  
91 et al., 2012). Although it is clear that EOs have toxic effects against pest insects, their mechanism of  
92 action is still unclear (Blenau et al., 2011; Jankowska et al., 2018). Typically, they are able to  
93 reduce or disrupt insect growth at several life stages (Konstantopoulou et al., 1992). It has been  
94 shown that terpenes can interact with P450 cytochromes, which are involved in insecticide  
95 detoxification processes (Jensen et al., 2006; Liao et al., 2016). Some monoterpenes, for example  
96 thymol, may induce neuronal degeneration through a direct interaction with GABA receptors  
97 (Priestley et al., 2003) or via acetylcholinesterase inhibition (Houghton et al., 2006; Park et al.,  
98 2016). Moreover, monoterpenes might interact with the octopamine/tyramine system, analogous to  
99 the adrenergic system present in the vertebrates (Enan, 2001; Kostyukovsky et al., 2002; Enan,  
100 2005a; Enan, 2005b; Price & Berry, 2006; Gross et al., 2017; Finetti et al., 2020).  
101 In insects, the main biogenic amines are dopamine (DA), serotonin (5-HT), octopamine (OA) and  
102 tyramine (TA). Together, they control and modulate a broad range of biological functions essential

103 for the insects life (Roeder et al., 2003). The insect's nervous system contains high levels of OA and  
104 TA, suggesting a role as neurotransmitters (Ohta & Ozoe, 2014), but also as neuromodulators and  
105 neurohormones in a wide variety of physiological processes (Pauls et al., 2018).  
106 Originally, TA was considered only as an intermediate product necessary for the synthesis of OA.  
107 Nevertheless, today it is known that TA and OA perform important functions independently of each  
108 other (Roeder, 2005; Lange, 2009; Roeder, 2020). TA triggers its physiological effects by  
109 interacting with and activating the corresponding receptors, belonging to the G Protein-Coupled  
110 Receptors (GPCR) family (Evans & Maqueira, 2005). Tyramine receptors (TARs) play important  
111 roles in modulating the biology, physiology and behaviour of invertebrates (Ohta & Ozoe, 2014). In  
112 fact, either the inhibition or the over stimulation of TARs can lead to the death of the insect as well  
113 as interfere with physical fitness and reproductive capacity (Audsley & Down, 2015). These  
114 receptors are classified into two main groups based on their structure and activity: tyramine  
115 receptors type 1 (TA/OA or TAR1) on one hand and tyramine receptors type 2 and 3 on the other  
116 (TAR2 and TAR3) (Wu et al., 2014). TAR1 transcripts localization analysis provides clues to  
117 understand its physiological roles. In *D. melanogaster*, the receptor is highly expressed in the  
118 central nervous system CNS (Saudou et al., 1990; El-Kholy et al., 2015). A similar expression  
119 pattern has been observed also in *D. sukuzii*, *R. prolixus*, *C. suppressalis*, *P. xylostella*, *M. brassicae*  
120 and *A. ipsilon* suggesting a crucial role for TA as neuromodulator and neurotransmitter (Wu et al.,  
121 2013; Hana & Lange, 2017; Ma et al., 2019; Brigaud et al., 2009; Duportets et al., 2010; Finetti et  
122 al., 2020). Several studies have reported the importance of TA, through its interaction with TARs,  
123 in a variety of processes including olfaction, reproduction, flight, locomotion and metabolic traits  
124 (Lange, 2009; Neckameyer & Leal, 2017; Roeder, 2020). In particular, TA appears to play a role in  
125 locomotor modulation (Saraswati et al., 2004; Hardie et al., 2007; Rillich et al., 2013; Schützler et  
126 al., 2019), in egg-laying behaviour (Donini & Lange, 2004; Fuchs et al., 2014), in sex pheromone  
127 production (Hirashima et al., 2007), in metabolic traits including the regulation of energy  
128 expenditure (Brembs et al., 2007) and hormone release (Roeder, 2020). Despite the physiological  
129 importance of TA in invertebrates, little is known about tyramine receptors. In 2000 Kutsukake and  
130 co-workers characterized *D. melanogaster hono*, a mutant line with an impaired TAR1, exhibiting a  
131 different behaviour towards repellent odours. Furthermore, Li et al. (2017) have showed that TAR1  
132 deficient flies exhibit significant changes in the metabolic control such as higher body fat, lower  
133 starvation resistance and movement activity. Similar TAR1-mediated metabolic alterations were  
134 observed by Ishida & Ozaki (2011) in starved flies. Nevertheless, the existence of a crosstalk  
135 between the tyraminerpic system and other systems, such as the octopaminergic and dopaminergic,  
136 makes it difficult to precisely dissect the physiological processes controlled by TA (Li et al., 2016).

137 In the last few years, several studies have suggested that TAR1 might be an interesting target for  
138 insecticides, specifically for bioinsecticides. For example, monoterpenes appear to be able to  
139 interact with TAR1 directly. In particular, Enan (2005b) was the first to describe an agonistic effect  
140 of several monoterpenes (thymol, carvacrol,  $\alpha$ -terpineol and eugenol) on *D. melanogaster* TAR1.  
141 However, the same monoterpenes did not show this pharmacological profile on *D. suzukii* and  
142 *Rhipicephalus microplus* TAR1 receptors. They acted instead as positive allosteric modulators,  
143 increasing the potency of TA activity (Gross et al., 2017; Finetti et al., 2020). Furthermore, a recent  
144 study from our lab has described a possible molecular mechanism underlying the toxicity of these  
145 molecules towards insects (Finetti et al., 2020). In particular, the observed downregulation of *D.*  
146 *suzukii* TAR1 (DsTAR1) after monoterpene exposure might represent a compensatory mechanism  
147 in response to the enhanced receptor signalling due to the positive allosteric modulatory effect of  
148 monoterpenes on the receptor.  
149 The current study presents a detailed investigation on *D. suzukii* behaviour upon monoterpenes  
150 treatment, in order to understand whether the *DsTAR1* downregulation could affect fitness and  
151 physiology. Furthermore, a *D. melanogaster* mutant line impaired in TAR1 was used as a control to  
152 compare the effects of chronic TAR1 absence on the physiology in *D. melanogaster* with  
153 monoterpenes-treated *D. suzukii* flies.

154

## 155 **Material and methods**

### 156 **Fly stocks**

157 *Drosophila suzukii* was kindly provided by the Entomological Laboratory of the Agricultural  
158 Sciences Department of the University of Padua, (Italy) and maintained on an artificial diet with a  
159 16:8 photoperiod, at a temperature of  $22 \pm 1$  °C. *Drosophila melanogaster* mutant lines were as  
160 follows: TAR1<sup>PL00408</sup> was generated by the Gene Disruption Project (Bloomington Stock Center,  
161 Indiana, USA) and TAR1-Gal4 was previously created in the Molecular Physiology group from the  
162 University of Kiel (El-Kholy et al., 2015). For behaviour experiments, *D. melanogaster* *y<sup>1</sup>w<sup>1118</sup>* was  
163 used as a control. All *D. melanogaster* flies were raised on standard food at  $25 \pm 1$  °C (12:12 light-  
164 dark photoperiod) as described previously (Li et al., 2016).

165

### 166 **Fumigant toxicity assay**

167 A glass cylinder (10 cm in height, 4.5 cm inner diameter; 150 ml) was employed to calculate the  
168 monoterpenes LC<sub>50</sub> values on *D. suzukii* and *D. melanogaster* *y<sup>1</sup>w<sup>1118</sup>* and to perform the  
169 monoterpenes exposure. Monoterpenes including thymol, carvacrol, and  $\alpha$ -terpineol were dissolved  
170 in acetone and applied to a filter paper (2 cm x 2 cm). The filter paper was placed on the bottom lid

171 of the cylinder, inside a small cage to prevent direct contact of the flies with the monoterpenes. The  
172 concentrations ranged between 0.067 - 67  $\mu$ l/L and acetone alone was used as negative control.  
173 After CO<sub>2</sub> anesthetization, thirty flies (fifteen males and fifteen females) were placed inside the  
174 cylinder with 1 ml of solid diet. The top and the bottom of the cylinder were sealed with parafilm  
175 and the assay was maintained at 22  $\pm$  1  $^{\circ}$ C for *D. suzukii* or 25  $\pm$  1  $^{\circ}$ C for *D. melanogaster* flies.  
176 After 24 h the flies were collected. For the LC<sub>50</sub> values calculation, at least one hundred flies were  
177 tested, in four replicates.

178

### 179 **Quantitative real-time PCR analysis**

180 Total RNA was extracted from *D. suzukii* or *D. melanogaster* *y<sup>1</sup>w<sup>1118</sup>* adult flies subjected to the  
181 monoterpene exposures using Aurum Total RNA Mini Kit (Bio-Rad, USA). One  $\mu$ g of RNA was  
182 treated with DNase I (Thermo Fisher, USA) and used for cDNA synthesis, carried out with the  
183 OneScript <sup>®</sup> cDNA Synthesis Kit (Abm, Canada), according to the manufacturer's instructions.  
184 Real time PCR was performed using a CFX Connect Real-Time PCR Detection System (Bio-Rad,  
185 USA) in a 12  $\mu$ l reaction mixture containing 1.6  $\mu$ l cDNA (diluted 1:2), 6  $\mu$ l Sybr PCR Master Mix  
186 (Vazyme, China), 0.4  $\mu$ l forward primer (10  $\mu$ M), 0.4  $\mu$ l reverse primer (10  $\mu$ M) and 3.6  $\mu$ l  
187 nuclease free water. Thermal cycling conditions were: 95  $^{\circ}$ C for 2 mins, 40 cycles at 95  $^{\circ}$ C for 15 s  
188 and 60  $^{\circ}$ C for 20 s. After the cycling protocol, a melting-curve analysis from 55  $^{\circ}$ C to 95  $^{\circ}$ C was  
189 applied. In *D. suzukii* expression of *TAR1* was normalized using *AK* and *TBP* genes that served as  
190 reference genes (Zhai et al., 2014). In *D. melanogaster* *y<sup>1</sup>w<sup>1118</sup>* expression of *TAR1* was normalized  
191 using *actin* and *tubulin* genes that served as reference genes (Ponton et al., 2011). Gene-specific  
192 primers (**Table 1**) were used and four independent biological replicates, made in triplicate, were  
193 performed for each sample.

194

### 195 **TAR1 immunohistochemistry**

196 The TAR1-Gal4 *Drosophila* line was crossed with an UAS-GFP line in order to visualize the  
197 complete brain expression pattern of the receptor. The brains were dissected from F1 flies in cold  
198 Schneider's *Drosophila* Medium and fixed in 4 % (w/v) paraformaldehyde in PBS for 90 mins at  
199 room temperature. The samples were then washed three times in PBST and blocked for 30 min in  
200 blocking buffer (1X PBS + 2 % NP-40 + 10 % goat serum) at room temperature. The samples were  
201 incubated with the primary antibodies in blocking buffer (anti-GFP rabbit 1:300 and anti-Nc82  
202 mouse 1:20) overnight at 4  $^{\circ}$ C and washed three times for 5 min in PBST. Subsequently, the  
203 samples were incubated with the secondary antibodies in blocking buffer (donkey anti-rabbit IgG  
204 Alexa Fluor-488 1:300 and goat anti-mouse IgG Alexa Fluor 555 1:300) for 3 h at room

205 temperature and washed twice for 5 min in PBST. Brains were mounted directly on slides and  
206 analysed by a Zeiss Axio Imager Z1 microscope equipped with an apotome (Zeiss, Germany).

207

### 208 **Body fat quantification**

209 Total body triglyceride (TG) content was estimated using the Triglyceride (TG) colorimetric assay  
210 kit GPO-PAP method (Elabscience, China). Three flies were accurately weighted and  
211 homogenation medium (9 times the volume, phosphate buffer 0.1 mol/L, pH 7.4) was added. The  
212 sample was mechanically homogenized on ice with a motorized pestle and centrifugated (at 2500  
213 rpm for 10 min). 7 µl of the supernatant were added to 700 µl of working solution kit, thoroughly  
214 mixed and incubated for 10 min at 37 °C in the dark. Absorbance was read at 510 nm and distilled  
215 water, added to 700 µl of working solution, was used as blank. Triglyceride content was estimated  
216 using a glycerol solution (2.26 mmol/L) as standard. Five independent biological replicates was  
217 performed for each sex and genotype.

218

### 219 **Dye-labelling food intake quantification**

220 The dye-labelling food intake quantification was performed as described by Deshpande and co-  
221 workers (Deshpande et al., 2014), with minor modifications. In brief, five flies of each sex and  
222 genotype were placed into a vial with 2 ml of 1 X dyed medium (2.5 % yeast, 2.5 % sucrose, 1 %  
223 agar and 1 % Brilliant Blue FCF – Sigma Aldrich, USA). After 2 h of feeding, the flies were  
224 collected and frozen at -80 °C. Frozen flies were transferred to 1.5 ml Eppendorf tubes,  
225 homogenized with a manual pestle in 50 ul of 1 % PBST and centrifugated for 1 min at 12000 g to  
226 clear the debris. The supernatant absorbance was measured at 630 nm on a label-free EnSight  
227 Multimode Plate Reader (Perkin Elmer, USA). The values obtained from flies fed with non-labelled  
228 food were used as control and subtracted from experimental readings. To determine the dye  
229 concentration of each fly homogenate a standard curve was generated with serial dilutions of an  
230 initial 10 µl aliquot of the non-solidified dye-labelled food added to 990 µl of 1 % PBST. At least  
231 five independent biological replicates were performed for each sex and genotype.

232

### 233 **Metabolic rate determination**

234 The measurement of the metabolic rate was assessed as described (Yatsenko et al., 2014). In brief,  
235 three adult flies were placed in each vial and the metabolic rate was measured for 2 h using the  
236 respirometry. The CO<sub>2</sub> yield during the test was calculated based on the µl produced per h per fly.  
237 Data were obtained from five independent biological replicates.

238

### 239 **Rapid iterative negative geotaxis (RING) assay**

240 The negative geotaxis assay was performed based on a published protocol (Gargano et al., 2005). In  
241 brief, five flies of each sex and genotype were placed into a 20 cm-tall glass tube without CO<sub>2</sub>-  
242 anaesthesia. The tube was tapped two times to move flies to the bottom and the climbing height of  
243 flies was photographed after 2 s. The average distance climbed in cm for each fly was measured  
244 using Image J software. Five independent biological replicates per sex and genotype were  
245 performed.

246

### 247 **Starvation resistance assay**

248 The starvation resistance assay was performed placing twenty-five flies of each sex and genotype in  
249 vials containing 1% of agar. The vials were maintained at  $22 \pm 1$  °C for *D. suzukii* or  $25 \pm 1$  °C for  
250 *D. melanogaster*. Dead flies were counted every 2 h until all flies were dead. For each genotype and  
251 sex, four independent biological replicates were performed (at least one hundred flies).

252

### 253 **Statistical analyses**

254 LC<sub>50</sub> values were evaluated using POLO-plus software. All statistical analyses were performed  
255 using GraphPad Prism software (version 6). All data represent the mean values  $\pm$  SEM, evaluated  
256 using the one-way ANOVA followed by Dunnett's test for multiple comparisons.

257

## 258 **Results**

### 259 **Monoterpenes LC<sub>50</sub> calculation**

260 The results of the LC<sub>50</sub> estimation as obtained by POLO-plus analyses for each monoterpene,  
261 performed on both *D. suzukii* and *D. melanogaster* *y<sup>1</sup>w<sup>1118</sup>* flies, are summarized in **Table 2**. The  
262 table reports the LC<sub>50-90</sub> values, the 95% confidence limits (Robertson et al., 2017), the slopes  
263 (angular coefficients) of lines and the values of  $\chi^2$  for each monoterpene.

264

### 265 **TAR1 expression analysis after monoterpenes exposure**

266 To evaluate the effect of the exposure to monoterpenes on the expression levels of *TAR1* gene in  
267 both *D. suzukii* and *D. melanogaster* *y<sup>1</sup>w<sup>1118</sup>*, flies were exposed to the LC<sub>50</sub> concentrations of  
268 thymol, carvacrol and  $\alpha$ -terpineol, respectively, and the mRNA levels analyzed by qPCR. The  
269 exposure induced an interesting downregulation of *TAR1* gene expression in both genotypes. In *D.*  
270 *suzukii*, significant differences were observed for thymol and carvacrol (**Figure 1, panel A**) but not  
271 for  $\alpha$ -terpineol. On the other hand, in *D. melanogaster* *y<sup>1</sup>w<sup>1118</sup>* all three monoterpenes induced a



272 significant downregulation of *TAR1* although less marked as compared to *D. suzukii* (**Figure 1,**  
273 **panel B**).

274

### 275 **TAR1 expression in *D. melanogaster* brain**

276 In order to determine the physiological functions controlled by TAR1, the receptor accumulation in  
277 *D. melanogaster* brains was investigated by immunohistochemistry. The Gal4-UAS system was  
278 used to selectively tag TAR1 with the GFP reporter protein, then recognized by the anti-GFP  
279 antibody. The receptor showed specific expression in the *pars intercerebralis* as well as lateral  
280 horn, sub-esophageal ganglia, mushroom bodies, and antennae mechanosensory - motor center  
281 (**Figure 2, panels A, B and C**), suggesting that TAR1 might be implicated in important  
282 physiological traits in *Drosophila*.

283

### 284 **Role of TAR1 in *Drosophila* physiology**

285 To elucidate the role of TAR1 in metabolic traits as well as locomotor control and physiological  
286 aspects in *Drosophila*, flies impaired in TAR1 (TAR1<sup>PL00408</sup> or TAR1<sup>-/-</sup>) were enrolled in several  
287 behavioural assays. Flies with the same genetic background (*y<sup>1</sup>w<sup>1118</sup>*) were used as controls. In  
288 general, the absence of TAR1 translates into a higher propensity to triglycerides accumulation and  
289 food intake (**Figure 3, panels A and B**). Therefore, TAR1<sup>-/-</sup> flies show higher resistance to  
290 starvation than control (**Figure 3, panel E**). These changes are furthermore associated with a slower  
291 metabolism in TAR1 impaired insects (**Figure 3, panel C**). The increased triglycerides  
292 accumulation and the slower metabolism could also be related to the lower propensity to movement  
293 of the TAR1<sup>-/-</sup> flies (**Figure 3, panel D**).

294 To test whether monoterpenes, besides downregulating *TAR1*, might also alter the physiology of  
295 *D. suzukii* and *D. melanogaster* (wild type or TAR1<sup>-/-</sup>), flies 24 h after the continued monoterpenes  
296 LC<sub>50</sub> exposure were challenged with several behavioural tests.

297

### 298 **Monoterpenes treatment - effects on total body triglyceride (TG) content**

299 24 h of exposure to monoterpenes caused a higher TG content in males of both *D. suzukii* and *D.*  
300 *melanogaster y<sup>1</sup>w<sup>1118</sup>* flies as compared to females (**Figure 4**). In particular, the TG content was  
301 significantly higher upon thymol and carvacrol exposure, only in *D. suzukii* males (**Figure 4, panel**  
302 **B**), while, both *D. melanogaster y<sup>1</sup>w<sup>1118</sup>* females and males showed a significantly higher TG  
303 content after carvacrol exposure (**Figure 4, panels C and D**). When the same treatments were  
304 applied to *D. melanogaster* TAR1<sup>-/-</sup> insects, no changes were observed in TG content, which was  
305 indistinguishable from the untreated control sample. This evidence would suggest that

306 monoterpenes can induce an increase in total fat deposition that requires TAR1 receptors be  
307 functional (**Figure 4, panels E and F**).

308

### 309 **Monoterpenes treatment - effects on food intake**

310 The food consumption was quantified after two hours of feeding on a dye-labelled diet. A  
311 significantly high food intake was observed only after  $\alpha$ -terpineol exposure in both *D. suzukii* and  
312 *D. melanogaster*  $y^1w^{1118}$  of both sexes (**Figure 5, panels A, B, C and D**). The increased food intake  
313 might explain the high triglyceride levels observed in both *D. suzukii* and *D. melanogaster*  $y^1w^{1118}$   
314 sexes after monoterpenes exposure. On the other hand, the monoterpene treatments did not cause  
315 any change in food consumption in *D. melanogaster* TAR1<sup>-/-</sup> mutant flies (**Figure 5, panels E and**  
316 **F**) further suggesting the requirement for an active TAR1.

317

### 318 **Monoterpenes treatment - effects on metabolic rate**

319 In order to determine if the monoterpenes and the TAR1 downregulation might affect the  
320 metabolism, the metabolic rate was analysed in all *D. suzukii* and *D. melanogaster* genotypes after  
321 treatment with the different monoterpenes. In *D. suzukii*, only males treated with the three  
322 monoterpenes showed a significantly lower metabolic rate than control flies (**Figure 6, panels A**  
323 **and B**). Carvacrol and  $\alpha$ -terpineol were able to reduce the metabolic rate in *D. melanogaster*  $y^1w^{1118}$   
324 males and females as well (**Figure 6, panels C and D**). Conversely, *D. melanogaster* TAR1<sup>-/-</sup>  
325 metabolic rate appeared unaffected by the treatments therefore undistinguishable from that of the  
326 untreated controls (**Figure 6, panels E and F**).

327

### 328 **Monoterpene treatment - effects on locomotory activity**

329 The observed metabolic changes in terms of energy expenditure and TG content might also affect  
330 flies physical activities. Therefore, the ability of flies exposed to monoterpenes to walk upwards on  
331 a vertical surface in negative geotaxis was used as a motility behavioural assay. In comparison to  
332 controls, *D. suzukii* and *D. melanogaster*  $y^1w^{1118}$  males showed a statistically significant reduction  
333 in climbing ability only after  $\alpha$ -terpineol treatment (**Figure 7, panels B and D**). *D. melanogaster*  
334  $y^1w^{1118}$  females motility was negatively affected only by thymol (**Figure 7, panel C**), while *D.*  
335 *suzukii* females did not respond to the RING assay at all, in both control and treated samples  
336 (**Figure 7, panel A**). The climbing ability in both *D. melanogaster* TAR1<sup>-/-</sup> sexes was unaffected by  
337 the exposure to monoterpenes, confirming the hypothesis of TAR1 involvement in this behavioural  
338 trait.

339

## 340 **Monoterpene treatment - effects on starvation resistance**

341 Finally, a starvation resistance assay was performed to investigate whether the monoterpene-  
342 mediated metabolic modifications could affect the general fitness. Given the higher food intake and  
343 TG content caused by the treatment, an enhanced starvation resistance was expected. *D. suzukii* and  
344 *D. melanogaster*  $y^1w^{1118}$  showed different results depending on the monoterpene used as compared  
345 to control (**Figure 8, panels A, B, C and D**). According to log-rank statistical analysis, a significant  
346 reduction in starvation resistance was detected in *D. suzukii*, both males and females, after carvacrol  
347 treatment (**Figure 8, panels A and B**) while both *D. melanogaster*  $y^1w^{1118}$  sexes were less resistant  
348 to starvation after thymol exposure. Moreover,  $\alpha$ -terpineol treatment reduced starvation resistance  
349 only in *D. melanogaster*  $y^1w^{1118}$  females flies (**Figure 8, panels C and D**). Conversely, the  
350 carvacrol exposure significantly increased the starvation resistance in *D. melanogaster*  $y^1w^{1118}$   
351 males (**Figure 8, panel C**). *D. melanogaster* TAR1<sup>-/-</sup> mutant were again unaffected by the  
352 treatment, thus showing starvation resistance comparable to controls (**Figure 8, panels E and F**).

353

## 354 **Discussion**

355 The biogenic amine TA is a mediator of several physiological functions in invertebrates (Roeder,  
356 2005; Lange, 2009), but its mechanism of action is still far from being fully characterized. TA  
357 activates intracellular responses by interacting with specific GPCRs, the tyramine receptors TAR  
358 (Saudou et al., 1990; Roeder et al., 2003). TAR1 is highly expressed in the CNS of numerous  
359 insects, thus suggesting its involvement in essential behavioural processes (El-Kholy et al., 2015;  
360 Hana & Lange, 2017; Finetti et al., 2020). Furthermore, several studies showed that TAR1 could be  
361 a direct target for biomolecules with insecticidal action, such as monoterpenes. In fact, it has been  
362 reported that the *D. melanogaster* and *R. microplus* TAR1s, when expressed in a heterologous cell  
363 system, respond to the administration of monoterpenes with an increased release of cytosolic  
364 calcium (Enan, 2005a; Gross et al., 2017). Recently, the same intracellular response has been  
365 observed in our laboratory for *D. suzukii* TAR1, allowing to hypothesize that the interaction  
366 between monoterpene and receptor causes a downregulation of the gene coding for the receptor  
367 (Finetti et al., 2020). To further study the effects of the monoterpenes on TAR1 and on the insect  
368 physiology, a *D. melanogaster* TAR1 deficient line (TAR1<sup>-/-</sup>) was evaluated together with matching  
369 controls and *D. suzukii*. Comparative studies using these two *Drosophila* species are possible since  
370 they are phylogenetically highly related and their TAR1 share a high degree of homology (98 %)  
371 (Finetti et al., 2020).

372 Firstly, the identification of the LC<sub>50</sub> for the three monoterpenes thymol, carvacrol and  $\alpha$ -terpineol,  
373 for both *D. suzukii* and *D. melanogaster*  $y^1w^{1118}$  via a fumigant assay (Park et al., 2016), revealed

374 that the most toxic monoterpene was carvacrol with a  $LC_{50}$  of 0.844  $\mu\text{l/L}$  for *D. suzukii* and 0.592  
375  $\mu\text{l/L}$  for *D. melanogaster*. Similarly, Zhang and co-workers (2016) observed that carvacrol was the  
376 most toxic monoterpene for *D. melanogaster*. Interestingly, when  $TAR1^{-/-}$  flies were treated with  
377 the monoterpenes at the  $LC_{50}$  calculated for the  $y^1w^{1118}$  strain a 40 % reduced mortality was  
378 observed as compared to the control (data not shown), suggesting a strong correlation between  
379 TAR1 and the insecticidal activity of these monoterpenes. A similar observation was made in a *D.*  
380 *melanogaster* TAR1 deficient strain (specifically  $TyrR^{Neo30}$ ), which appeared to be insensitive to  
381 thymol and carvacrol when topically applied (Enan, 2005a).

382 All three monoterpenes tested, thymol, carvacrol and  $\alpha$ -terpineol, after 24 h of fumigant treatment,  
383 were able to induce a TAR1 downregulation not only in *D. suzukii* (as already established, Finetti et  
384 al., 2020) but also in *D. melanogaster*. Since TAR1 is mainly expressed in the CNS, the greatest  
385 impact of its downregulation might be expected in this region.

386 As shown by El-Kholy et al. (2015), in a study focused on *D. melanogaster* brain, TAR1 is  
387 expressed in the *pars intercerebralis*, mushroom bodies and ellipsoid body, as confirmed also by Li  
388 et al. (2016). Our study revealed that TAR1 is strongly expressed not only in the *pars*  
389 *intercerebralis* and the mushroom bodies but also in lateral horn, sub-esophageal ganglia, and  
390 antennae mechanosensory centre. Even if the physiological significance of these specific TAR1  
391 expression patterns in the *Drosophila* SNC is still unclear, they are likely directly connected to the  
392 functions associated with the corresponding brain areas. The *pars intercerebralis* is an important  
393 insect neuroendocrine center composed by neurosecretory cells that regulate feeding  
394 (olfactory/gustatory perception of food sources; feedback information from the intestinal tract and  
395 body cavity regarding the urgency of feeding) and reproductive behaviours (Velasco et al., 2006).  
396  $TAR1^{-/-}$  mutant flies showed a phenotypic profile that correlates with these observations. These flies  
397 are in fact characterized by increased body fat, higher food intake and starvation resistance as well  
398 as reduced locomotor activity and metabolic rate in comparison to  $y^1w^{1118}$  controls (Li et al., 2016;  
399 Li et al., 2017). These metabolic alterations were not sex dependent, although the effects in  $TAR1^{-/-}$   
400 males appeared to be more pronounced as compared to those seen in females. This could be related  
401 to sex-dependent differences in TAR1 expression, whose mRNAs accumulated at higher levels in  
402 males than in females (Finetti et al., 2020). Despite all this, little is still known on the precise  
403 mechanism by which the tyraminerpic system modulates essential metabolic traits such as fat body,  
404 food intake, starvation resistance, locomotor activity and metabolic rate.

405 In insects, fat is mainly stored in the fat body, which is, at the same time, one of the most important  
406 metabolic centers (Arrese & Soulages, 2010). Lipid storage and release are mainly controlled by  
407 two hormones, the *Drosophila* insulin-like peptides (mainly dILP2) and the AKH (Adipokinetic

408 hormone, analogous to the mammalian glucagon) (Roeder, 2020). During an acute stress situation,  
409 the mobilization of lipids is essential for survival. This mechanism appears to be also controlled by  
410 both, OA and TA, presumably through modulation of dILP secretion (Fields & Woodring, 1991;  
411 Orchard et al., 1993). In fact, it has recently been observed that in *C. elegans*, during acute stress,  
412 TA accumulates, which in turn modulates insulin signal (De Rosa et al., 2019). Therefore, increased  
413 TG level observed in  $TAR1^{-/-}$ , as compared to  $y^1w^{1118}$  control flies, might be related to a direct  
414 tyraminergetic action on the release of dILPs. RNAi-mediated TAR1 silencing, targeted to the fat  
415 body, triggered reduction of dILP2 in insulin-producing cells in the *D. melanogaster pars*  
416 *intercerebralis* and an increased TG accumulation (Li et al., 2017). The increased TG levels in  
417  $TAR1^{-/-}$  flies could also be linked to enhanced food intake as well as to lower movement propensity  
418 and metabolic rate. It has recently been proposed, in fact, that TAR1 could be involved in processes  
419 related to sugar sensibility and food intake regulation (Ishida & Ozaki, 2010). For example, both  
420 *honoka* and TAR1 KO flies (TyR<sup>05682</sup>) showed a reduced sugar response (Damrau et al., 2019)  
421 linked to differences in food intake. It is worth noting that TAR1 is highly expressed in neurons  
422 located in the sub-esophageal ganglia that are presumably associated with the salivary glands and  
423 neck muscles control, thus linked with feeding.

424 After monoterpene treatments, both *D. melanogaster y<sup>1</sup>w<sup>1118</sup>* and *D. suzukii* showed alterations in all  
425 behavioural assays performed. The link between monoterpene treatment and TAR1 downregulation  
426 is supported by the higher food intake observed in response to this treatment. When the *D.*  
427 *melanogaster*  $TAR1^{-/-}$  deficient line was considered, no phenotypic changes were observed  
428 whatsoever after exposure to monoterpenes, suggesting that the alterations observed in the other  
429 genotypes require the correct expression of a functioning receptor. This further confirms the  
430 relationship between monoterpenes-induced behavioural changes and TAR1. TAR1-mediated  
431 physiological alterations due to monoterpenes were also observed in *P. regina*. In fact, D-limonene  
432 treatment decreased TA levels in *P. regina* brain, causing a direct modification of the food intake  
433 (Nishimura et al., 2005). This different response to food stimuli was subsequently attributed to a  
434 probable alteration of the TAR1 expression at the level of the sub-exophageal ganglion (Yshida &  
435 Ozaki, 2011). Furthermore, thymol and carvacrol appeared to play a crucial role modulating ant  
436 behaviour (locomotion and aggression), through aminergic regulation (Mannino et al., 2018).

437 In conclusion, this study shows that monoterpenes might be instrumental in the manipulation of the  
438 insect behaviour via TAR1. In fact, sublethal concentrations of thymol, carvacrol and  $\alpha$ -terpineol  
439 downregulate TAR1 expression, ultimately affecting important metabolic traits such as starvation  
440 resistance and energy storage. Moreover, this work demonstrated that monoterpenes, in addition to

441 their insecticidal properties, can modify the metabolism and fitness of surviving *D. suzukii* opening  
442 to innovative applications of these molecules in the pest control.

443

#### 444 **Acknowledgements**

445 We would like to thank Dr. Morena de Bastiani (University of Ferrara) for excellent technical  
446 assistance and Dr. Federica Albanese (University of Ferrara, Italy) for linguistic improvement of the  
447 manuscript.

448

#### 449 **Competing interests**

450 All authors declare no competing interests.

451

#### 452 **References**

453 **Arrese, E.L. and Soulages, J.L.** (2010). Insect fat body: energy, metabolism, and regulation. *Annual Review of*  
454 *Entomology* **55**, 207-225.

455

456 **Asplen, M.K., Anfora, G., Biondi, A., Choi, D.S., Chu, D., Daane, K.M. and Desneux, N.** (2015). Invasion biology  
457 of spotted wing *Drosophila* (*Drosophila suzukii*): a global perspective and future priorities. *Journal of Pest Science*  
458 **88**(3), 469-494.

459

460 **Audsley, N. and Dom, R.E.** (2015). G protein coupled receptors as target for next generation pesticides. *Insect*  
461 *Biochemistry and Molecular Biology* **67**, 27-37.

462

463 **Bakkali, F., Averbeck, S., Averbeck, D. and Idaomar, M.** (2008). Biological effects of essential oils - a review. *Food*  
464 *and Chemical Toxicology* **46**, 446-475.

465

466 **Blenau, W., Rademacher, E. and Baumann, A.** (2011). Plant essential oils and formamidines as  
467 insecticides/acaricides: What are the molecular targets? *Apidologie* **43**(3), 334-347.

468

469 **Brembs, B., Christiansen, F., Pfluger, H.J. and Duch, C.** (2007). Flight initiation and maintenance deficits in flies  
470 with genetically altered biogenic amines levels. *Journal of Neuroscience* **27**, 11122-11131.

471

472 **Brigaud, L., Grosmaître, X., François, M.C. and Jacqion-Joly, E.** (2009). Cloning and expression pattern of a  
473 putative octopamine/tyramine receptor in antennae of the noctuid moth *Mamestra brassicae*. *Cell Tissue Research* **335**,  
474 445-463.

475

476 **Cini, A., Ioriatti, C. and Anfora, G.** (2012). A review of the invasion of *Drosophila suzukii* in Europe and a draft  
477 research agenda for integrated pest management. *Bulletin of Insectology* **65**(1), 149-160.

478

- 479 **Dam, D., Molitor, D. and Beyer, M.** (2019). Natural compounds for controlling *Drosophila suzukii*. A review.  
480 *Agronomy for Sustainable Development* **39**, 53.  
481
- 482 **Damrau, C., Toshima, N., Tanimura, T., Brembs, B. and Colomb, J.** (2019). Octopamine and tyramine contribute  
483 separately to the counter-regulatory response to sugar deficit in *Drosophila*. *Frontiers in Systems Neuroscience* **11**, 100.  
484
- 485 **De Rosa, M.J., Veuthey, T., Florman, J., Grant, J., Blanco, M.G., Andersen, N., Donnelly, J., Rayes, D. and**  
486 **Alkema, M.J.** (2019). The flight response impairs cytoprotective mechanism by activating the insulin pathway. *Nature*  
487 **573**, 135-138.  
488
- 489 **Deshpande, S.A., Carvalho, G.B., Amador, A., Phillips, A.M., Hoxha, S., Lizotte, K.J. and Ja, W.W.** (2014).  
490 Quantifying *Drosophila* food intake: comparative analysis of current methodology. *Nature Methods* **11(5)**, 535-540.  
491
- 492 **Desneux, A., Decourtye, A. and Delpuech, J.M.** (2007). The sublethal effects of pesticides on beneficial arthropods.  
493 *Annual Review of Entomology* **52**, 81-106.  
494
- 495 **Donini, A. and Lange, A.B.** (2004). Evidence for a possible neurotransmitter/neuromodulator role of tyramine on the  
496 locust oviducts. *Journal of Insect Physiology* **50**, 351-361.  
497
- 498 **Duportets, L., Barrozo, R., Bozzolan, F., Gaertner, C., Anton, S., Gadenne, C. and Debernard, S.** (2010) Cloning  
499 of an octopamine/tyramine receptor and plasticity of its expression as a function of adult sexual maturation in the male  
500 moth *Agrotis ipsilon*. *Insect Molecular Biology* **19(4)**, 489-499.  
501
- 502 **El-Kholy, S., Stephano, F., Li, Y., Bhandari, A., Fink, C. and Roeder, T.** (2015). Expression analysis of octopamine  
503 and tyramine receptors in *Drosophila*. *Cell and Tissue Research* **361(3)**, 669-684.  
504
- 505 **Enan, E.E.** (2001). Insecticidal activity of essential oils: octopaminergic sites of action. *Comparative Biochemistry and*  
506 *Physiology - Part C: Toxicology & Pharmacology* **130**, 325-337.  
507
- 508 **Enan, E.E.** (2005a). Molecular response of *Drosophila melanogaster* tyramine receptor cascade to plant essential oils.  
509 *Insect Biochemistry and Molecular Biology* **35**, 309-321.  
510
- 511 **Enan, E.E.** (2005b). Molecular and pharmacological analysis of an octopamine receptor from American cockroach and  
512 fruit fly in response to plant essential oils. *Archives of Insect Biochemistry and Physiology* **59**, 161-171.  
513
- 514 **Evans, P.D. and Maqueira, B.** (2005). Insect octopamine receptors: a new classification scheme based on studies of  
515 cloned G-protein coupled receptors. *Invertebrate Neuroscience* **5**, 111-118.  
516
- 517 **Fields, P.E. and Woodring, J.P.** (1991). Octopamine mobilization of lipids and carbohydrates in the house cricket,  
518 *Acheta domesticus*. *Journal of Insect Physiology* **37(3)**, 193-199.  
519

- 520 **Finetti, L., Ferrari, F., Calò, G., Cassanelli, S., De Bastiani, M., Civolani, S. and Bernacchia G.** (2020).  
521 Modulation of *Drosophila suzukii* type 1 tyramine receptor (DsTAR1) by monoterpenes: a potential new target for next  
522 generation biopesticides. *Pesticide Biochemistry and Physiology* **165**, 91-101.
- 523  
524 **Fuchs, S., Behrends, V., Bundy., J.G., Crisanti, A. and Nolan, T.** (2014). Phenylalanine metabolism regulates  
525 reproduction and parasite melanisation in the malaria mosquito. *PLoS ONE* **9**, e84865.
- 526  
527 **Gargano, J.W., Martin, I., Bhandari, P. and Grotewiel, M.S.** (2005). Rapid iterative negative geotaxis (RING): a  
528 new method for assessing age-related locomotor decline in *Drosophila*. *Experimental Gerontology* **40(5)**, 386-395.
- 529  
530 **Gross, A.D., Temeyer, K.B., Day, T.A., Pérez de León, A.A., Kimber, M.J. and Coats J.R.** (2017). Interaction of  
531 plant essential oil terpenoids with the southern cattle tick tyramine receptor: A potential biopesticide target. *Chemico-*  
532 *Biological Interactions* **263**, 1-6.
- 533  
534 **Hana, S. and Lange, A.** (2017). Cloning and functional characterization of Oct $\beta$ 2-receptor and Tyr1-receptor in the  
535 Chagas disease vector, *Rhodnius prolixus*. *Frontiers in Physiology* **8**, 744.
- 536  
537 **Hardie, S.L., Zhang, J.X. and Hirsh, J.** (2007). Trace amines differentially regulate adult locomotor activity, cocaine  
538 sensibility and female fertility in *Drosophila melanogaster*. *Developmental Neurobiology* **67**, 1396-1405.
- 539  
540 **Haviland, D.R. and Beers, E.H.** (2012). Chemical control programs for *Drosophila suzukii* that comply with  
541 international limitations on pesticides residues for exported sweet cherries. *Journal of Integrated pest Management*  
542 **3(2)**, 1-6.
- 543  
544 **Hirashima, A., Yamaji, H., Yoshizawa, T., Kuwano, E. and Eto, M.** (2007). Effect of tyramine and stress on sex-  
545 pheromone production in pre- and post-mating silkworm moth, *Bombyx mori*. *Journal of Insect Physiology* **53**, 1242-  
546 1249.
- 547  
548 **Houghton, P.J., Ren, Y. and Howes, M.J.** (2006). Acetylcholinesterase inhibitors from plants and fungi. *Natural*  
549 *Product Reports* **23(2)**, 181-199.
- 550  
551 **Ishida, Y. and Ozaki, M.** (2011). A putative octopamine/tyramine receptor mediating appetite in a hungry fly.  
552 *Naturwissenschaften* **98**, 635-638.
- 553  
554 **Isman, M.B.** (2020). Botanical insecticides in the twenty-first century – fulfilling their promise? *Annual Review of*  
555 *Entomology* **65**, 233-249.
- 556  
557 **Jankowska, M., Wyszowska, J., Stankiewicz, M and Rogalska, J.** (2018). Molecular targets for components of  
558 essential oils in the insect nervous system – a review. *Molecules* **23**, 34.
- 559



- 560 **Jensen, H.R., Scott, I.M., Sims, S.R., Trudeau, V.L. and Arnason, J.T.** (2006). The effect of a synergistic  
561 concentration of a Piper nigrum extract used in conjunction with pyrethrum upon gene expression in *Drosophila*  
562 *melanogaster*. *Insect Molecular Biology* **15**, 329-339.
- 563
- 564 **Kim, J., Jang, M., Shin, E., Kim, J., Lee, S. H. and Park, C. G.** (2016). Fumigant and contact toxicity of 22 wooden  
565 essential oils and their major components against *Drosophila suzukii* (Diptera: Drosophilidae). *Pesticide Biochemistry*  
566 *and Physiology* **133**, 35-43.
- 567
- 568 **Konstantopoulou, I., Vassipoulou, L., Mauragani-Tsipidov, P. and Scouras, Z.G.** (1992). Insecticidal effects of  
569 essential oils. A study of the effects of essential oils extracted from eleven Greek aromatic plants on *Drosophila*  
570 *auraria*. *Experientia* **48**, 616-619.
- 571
- 572 **Kostyukovsky, M., Rafaeli, A., Gileadi, C., Demchenko, N. and Shaaya, E.** (2002). Activation of octopaminergic  
573 receptors by essential oil constituents isolated from aromatic plants: possible mode of action against insect pests. *Pest*  
574 *Management Science* **58(11)**, 1101-1106.
- 575
- 576 **Kutsukake, M., Komatsu, A., Yamamoto, D. and Ishiwa-Chigusa, S.** (2000) A tyramine receptor gene mutation  
577 causes a defective olfactory behaviour in *Drosophila melanogaster*. *Gene* **245**, 31-42.
- 578
- 579 **Lange, A.B.** (2009). Tyramine: from octopamine precursor to neuroactive chemical in insects. *General and*  
580 *Comparative Endocrinology* **162**, 18-26.
- 581
- 582 **Lee, J.C., Bruck, D.J., Curry, H., Edwards, D., Haviland, D.R., Van Steenwyk, R.A. and Yorgey, B.M.** (2011).  
583 The susceptibility of small fruits and cherries to the spotted-wing *Drosophila*, *Drosophila suzukii*. *Pest Management*  
584 *Science* **67**, 1358-1367.
- 585
- 586 **Li, Y., Hoffmann, J., Li, Y., Stephano, F., Bruchhaus, I., Fink, C. and Roeder, T.** (2016) Octopamine controls  
587 starvation resistance, life span and metabolic traits in *Drosophila*. *Scientific Reports* **19(6)**, 35359.
- 588
- 589 **Li, Y., Tiedemann, L., Von Frieling, J., Nolte, S., El-Kholy, S., Stephano, F., Gelhaus, C., Bruchhaus, I., Fink, C.**  
590 **and Roeder, T.** (2017) The role of monoaminergic neurotransmission for metabolic control in the fruit fly *Drosophila*  
591 *melanogaster*. *Frontiers in Systems Neuroscience* **11**, 60.
- 592
- 593 **Liao, M., Xiao, J-J., Zhou, L-J., Liu, Y., Wu, X-W., Hua, R-M., Wang, G-R. and Cao, H-Q.** (2016). Insecticidal  
594 activity of *Melaleuca alternifolia* essential oil and RNA-seq analysis of *Sitophilus zeamais* transcriptome in response to  
595 oil fumigation. *PLoS ONE* **11**, 12.
- 596
- 597 **Ma, H., Huang, Q., Lai, X., Liu, J., Zhu, H., Zhou, Y., Deng, X. and Zhou, X.** (2019). Pharmacological properties of  
598 the type 1 tyramine receptor in the Diamondback moth, *Plutella xylostella*. *International Journal of Molecular Sciences*  
599 **20**, 2953.
- 600

- 601 **Mannino, G., Abdi, G., Maffei, M.E. and Barbero, F.** (2018). *Origanum vulgare* terpenoids modulate *Myrmica*  
602 *scabrinodis* brain biogenic amines and ant behaviour. *PLoS ONE* **13(12)**, e0209047.
- 603
- 604 **Neckameyer, W.S. and Leal, S.M.** (2017) Diverse functions of insect biogenic amines as neurotransmitters,  
605 neuromodulators and neurohormones. In book: *Hormones, Brain and Behaviour* **2**, 367-401.
- 606
- 607 **Nishimura, T., Seto, A., Nakamura, K., Miyama, M., Nagao, T., Tamotsu, S., Yamaoka, R. and Ozaki, M.** (2005).  
608 Experimental effects of appetitive and nonappetitive odors of feeding behavior in the blowfly, *Phormia regina*: a  
609 putative role for tyramine in appetite regulation. *Journal of Neuroscience* **25**, 7507-7516.
- 610
- 611 **Ohta, H. and Ozoe, Y.** (2014). Molecular signalling, pharmacology, and physiology of octopamine and tyramine  
612 receptors as potential insect pest control targets. *Advances in Insect Physiology* **46**, chapter two.
- 613
- 614 **Orchard, I., Ramirez, J.M. and Lange, A.B.** (1993). A multifunctional role for octopamine in Locust flight. *Annual*  
615 *Review of Entomology* **38**, 227-249.
- 616
- 617 **Park, C.G., Jang, M., Yoon, K.A. and Kim, J.** (2016). Insecticidal and acetylcholinesterase inhibitory activities of  
618 Lamiaceae plant essential oils and their major components against *Drosophila suzukii* (Diptera: Drosophilidae).  
619 *Industrial Crops and Products* **89**, 507-513.
- 620
- 621 **Pauls, D., Blechschmidt, C., Frantzmann, F., Jundi, B. and Selcho, M.** (2018). A comprehensive anatomical map of  
622 the peripheral octopaminergic/tyraminergetic system of *Drosophila melanogaster*. *Scientific Reports* **8**, 15314.
- 623 Ponton, F., Chapuis, M-P., Pernice, M., Sword, G.A. & Simpson, S.J. 2011. Evaluation of potential reference genes for  
624 reverse transcription-qPCR studies of physiological responses in *Drosophila melanogaster*. *Journal of Insect*  
625 *Physiology* **57**: 840-850.
- 626
- 627 **Price, D.N. and Berry, M.S.** (2006). Comparison of effects of octopamine and insecticidal essential oils on activity in  
628 the nerve cord, foregut and dorsal unpaired median neurons of cockroaches. *Journal of Insect Physiology* **52**, 309-319.
- 629
- 630 **Priestley, C.M., Williamson, E.M., Wafford, K.A., Satelle and D.B.** (2003). Thymol, a constituent of thyme essential  
631 oils, is a positive modulator of human GABA and a homo-oligosteric GABA receptor from *Drosophila melanogaster*.  
632 *British Journal of Pharmacology* **140**, 1363-1372.
- 633
- 634 **Regnault-Roger, C., Vincent, C. and Arnason J.T.** (2012). Essential oils in insect control: low-risk products in a  
635 high-stakes world. *Annual Review of Entomology* **57**, 405-424.
- 636
- 637 **Rillich, J., Stevenson, P. and Pflueger, H.** (2013). Flight and walking in locust-cholinergic co-activation, temporal  
638 coupling, and its modulation by biogenic amines. *PLoS ONE* **8**, e62899.
- 639
- 640 **Robertson, J.L., Jones, M.M., Olguin, E. and Alberts, B.** (2017). Bioassays with arthropods. 3rd ed. Boca Raton, FL:  
641 CRC Press, Taylor & Francis Group.

642

643 **Roeder, T.** (2005). Tyramine and octopamine: ruling behaviour and metabolism. *Annual Review of Entomology* **50**,  
644 447-477.

645

646 **Roeder, T.** (2020). The control of metabolic traits by octopamine and tyramine in invertebrates. *Journal of*  
647 *Experimental Biology* **223**, 194282.

648

649 **Roeder, T., Seifert, M., Kähler, C. and Gewecke, M.** (2003). Tyramine and octopamine: antagonist modulators of  
650 behavior and metabolism. *Archives of Insect Biochemistry and Physiology* **54**, 1-13.

651

652 **Rota-Stabelli, O., Blaxter, M. and Anfora, G.** (2013). *Drosophila suzukii*. *Current Biology* **23**, 8-9.

653

654 **Saraswati, S., Fox, L.E., Soll, D.R. & Wu, C-F.** (2004). Tyramine and octopamine have opposite effects on the  
655 locomotion of *Drosophila* larvae. *Journal of Neurobiology* **58(4)**, 425-41.

656

657 **Saudou, F., Amlaiky, N., Plassat, J.L., Borrelli, E. and Hen, R.** (1990). Cloning and characterization of a *Drosophila*  
658 tyramine receptor. *The EMBO Journal* **9(11)**, 3611-3617.

659

660 **Schetelig, M.F., Lee, K.Z., Otto, S., Talmann, L., Stokl, J., Degenkolb, T., Vilcinskas, A. and Halitschke, R.**  
661 (2017). Environmentally sustainable pest control options for *Drosophila suzukii*. *Journal of Applied Entomology* **142(1-**  
662 **2)**, 3-17.

663

664 **Schützler, N., Girwert, C., Hügli, I., Mohana, G., Roignant, J-Y., Ryglewski, S and Duch, C.** (2019). Tyramine  
665 action on motoneuron excitability and adaptable tyramine/octopamine ratios adjust *Drosophila* locomotion to  
666 nutritional state. *PNAS* **116**, 3805-3810.

667

668 **Velasco, B., Erlik, T., Shy, D., Sclafani, J., Lipshitz, H., McInnes, R & Hartenstein, V.** (2006). Specification and  
669 development of the pars intercerebralis and pars lateralis, neuroendocrine command centers in the *Drosophila* brain.  
670 *Developmental Biology* **302(1)**, 309-323.

671

672 **Walsh, D.B., Bolda, M.P., Goodhue, R.E., Dreves, A.J., Lee, J.C., Bruck, D.J., Walton, V.M., O'neal, S.D. and**  
673 **Zalom, F.G.** (2011). *Drosophila suzukii* (Diptera: Drosophilidae): Invasive pest of ripening soft fruit expanding its  
674 geographic range and damage potential. *Journal of Integrated Pest Management* **1**, 1-7.

675

676 **Wu, S.F., Huang, J. and Ye, Y.Y.** (2013). Molecular cloning and pharmacological characterisation of a tyramine  
677 receptor from the rice stem borer, *Chilo suppressalis* (Walker). *Pest Management Science* **69**, 126-134.

678

679 **Wu, S.F., Xu, G., Qi, Y.X., Xia, R.Y., Huang, J. and Ye, G.Y.** (2014). Two splicing variants of a novel family of  
680 octopamine receptors with different signalling properties. *Journal of Neurochemistry* **129**, 37-47.

681

682 **Yatsenko, A.S., Marrone, A.K., Kucherenko, M.M and Shcherbata, H.R.** (2014). Measurement of metabolic rate in  
683 *Drosophila* using respirometry. *Journal of Visualized Experiments* **24(88)**, e51681.

684

685 **Zhai, Y., Lin, Q., Zhou, X., Zhang, X., Liu, T. & Yu, Y.** (2014). Identification and validation of reference genes for  
686 quantitative real-time PCR in *Drosophila suzukii* (Diptera: Drosophilidae). *PLoS ONE* **9(9)**, e106800.

687

688 **Zhang, Z., Yang, T., Zhang, Y., Wang, L and Xie Y.** (2016). Fumigant toxicity of monoterpenes against fruitfly,  
689 *Drosophila melanogaster*. *Industrial Crops and Products* **81**, 147-151.

690

691 **Table 1.** Primers used in this study.

| Primers          | Primer sequence (5'-3') |
|------------------|-------------------------|
| Dmel_TAR1-Fw     | CACTCTGGAGGCGGAAAGT     |
| Dmel_TAR1-Rev    | GCAACGGAGTGACAGAAACG    |
| Dmel_Actin-Fw    | GCGTCGGTCAATTCAATCTT    |
| Dmel_Actin-Rev   | AAGCTGCAACCTCTTCGTCA    |
| Dmel_Tubulin-Fw  | TGTCGCGTGTGAAACACTTC    |
| Dmel_Tubulin-Rev | AGCAGGCGTTTCCAATCTG     |
| Dsuz_TAR1-Fw     | GCAGTCCTCGTCCACCTG      |
| Dsuz_TAR1-Rev    | TTAAGGGACGTCTGCTCGTC    |
| Dsuz_AK-Fw       | CTACCACAACGATCCAAGA     |
| Dsuz_AK-Rev      | AAGGTCAGGAAGCCGAGA      |
| Dsuz_TBP-Fw      | CCACGTGAATCTGTGCT       |
| Dsuz_TBP-Rev     | GGAGTCGTCCTCGCTCTT      |

692

693

694

695

696

697

698

699

700

701

702

703

704

705 **Table 2.**

| <i>D. suzukii</i>                                    |                   |                                     |                                     |          |
|------------------------------------------------------|-------------------|-------------------------------------|-------------------------------------|----------|
| Compound                                             | Slope ( $\pm$ SE) | LC <sub>50</sub> (95% CI) $\mu$ l/L | LC <sub>90</sub> (95% CI) $\mu$ l/L | $\chi^2$ |
| Thymol                                               | 1.704 $\pm$ 0.318 | <b>1.085</b> (0.549 - 1.575)        | 6.117 (4.362 – 10.854)              | 2.605    |
| Carvacrol                                            | 2.289 $\pm$ 0.341 | <b>0.844</b> (0.322 - 1.340)        | 3.075 (1.930 – 8.744)               | 3.991    |
| $\alpha$ -terpineol                                  | 2.647 $\pm$ 0.307 | <b>1.494</b> (0.677 - 2.446)        | 4.563 (2.754 – 14.164)              | 6.493    |
| <i>D. melanogaster y<sup>1</sup>w<sup>1118</sup></i> |                   |                                     |                                     |          |
| Compound                                             | Slope ( $\pm$ SE) | LC <sub>50</sub> (95% CI) $\mu$ l/L | LC <sub>90</sub> (95% CI) $\mu$ l/L | $\chi^2$ |
| Thymol                                               | 1.749 $\pm$ 0.209 | <b>0.604</b> (0.152 – 2.036)        | 3.260 (1.172 – 24.484)              | 3.472    |
| Carvacrol                                            | 1.864 $\pm$ 0.258 | <b>0.592</b> (0.156 – 1.636)        | 2.888 (1.136 – 38.072)              | 2.168    |
| $\alpha$ -terpineol                                  | 1.677 $\pm$ 0.433 | <b>0.984</b> (0.300 – 1.524)        | 5.252 (3.080 – 16.900)              | 1.343    |

706

707 **Table 2.** LC<sub>50-90</sub> of fumigant active monoterpenes thymol, carvacrol and  $\alpha$ -terpineol against *D. suzukii* and *D.*  
 708 *melanogaster y<sup>1</sup>w<sup>1118</sup>*.

709

710

711

712

713

714

715

716

717

718

719

720

721

722

723

724

725

726

727

728 **Figure 1.**

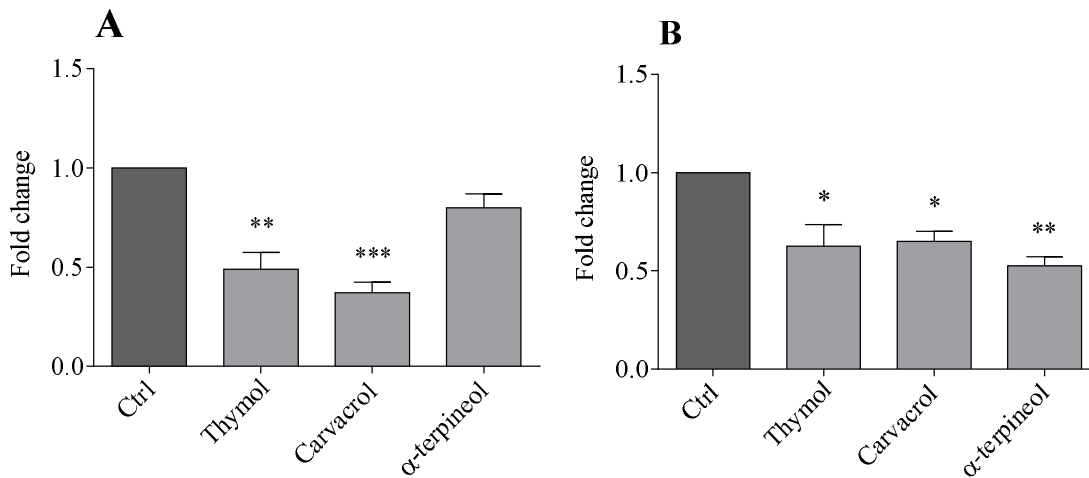

729

730 **Figure 1. *D. sukuzii* (panel A) and *D. melanogaster y1w1118* (panel B) *TARI* expression levels after 24 h**  
731 **of continuous exposure to the LC<sub>50</sub> of thymol, carvacrol and  $\alpha$ -terpineol. Data represent means  $\pm$  SEM of**  
732 **four independent experiments performed in triplicate. \*p < .05 \*\*p < .01 \*\*\*p < .005 vs control according to**  
733 **one-way ANOVA followed by Dunnett's test for multiple comparisons. Arginine kinase (*AK*) and TATA**  
734 **Box Protein (*TBP*) were used as reference genes in *D. sukuzii* analysis (Zhai et al., 2014); *actin* and *tubulin***  
735 **were used as reference gene in *D. melanogaster y1w1118* analysis (Ponton et al., 2011).**

736

737

738

739

740

741

742

743

744

745

746

747

748

749

750

751

752

753

754

755 **Figure 2.**

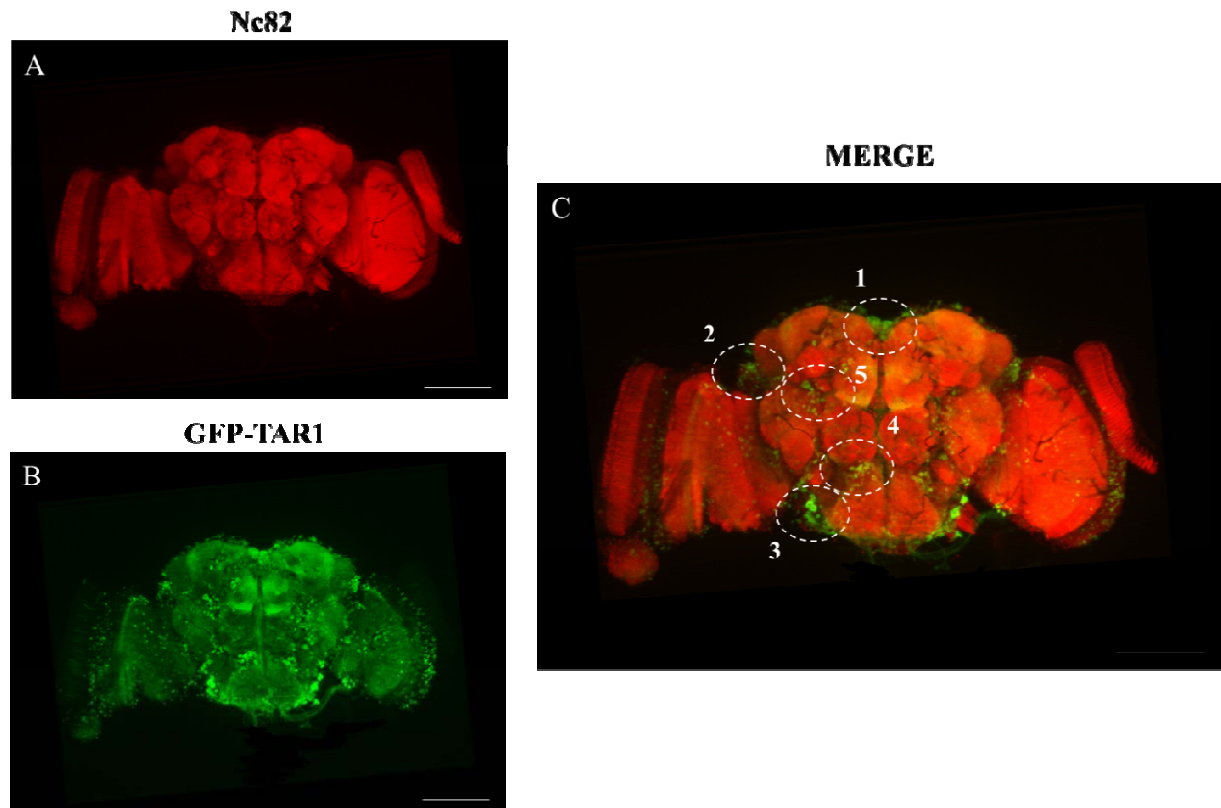

756

757 **Figure 2. Activity of the TAR1 promoter in the *D. melanogaster* brain.** Representative confocal images  
758 of GFP driven by TAR1-Gal4: synaptic regions are labelled with the presynaptic marker Nc82 (anti-  
759 Bruchpilot), TAR1 is marked by anti-GFP antibody. TAR1 is mainly localized in the *pars intercerebralis*  
760 (1), lateral horn (2), sub-esophageal zone (3), antennae mechanosensory - motor center (4) and mushroom  
761 bodies (5), as showed in the merge (**Panel C**). Scale bars = 100  $\mu$ m for **A, B, C**.

762

763

764

765

766

767

768

769

770

771

772

773

774 **Figure 3.**

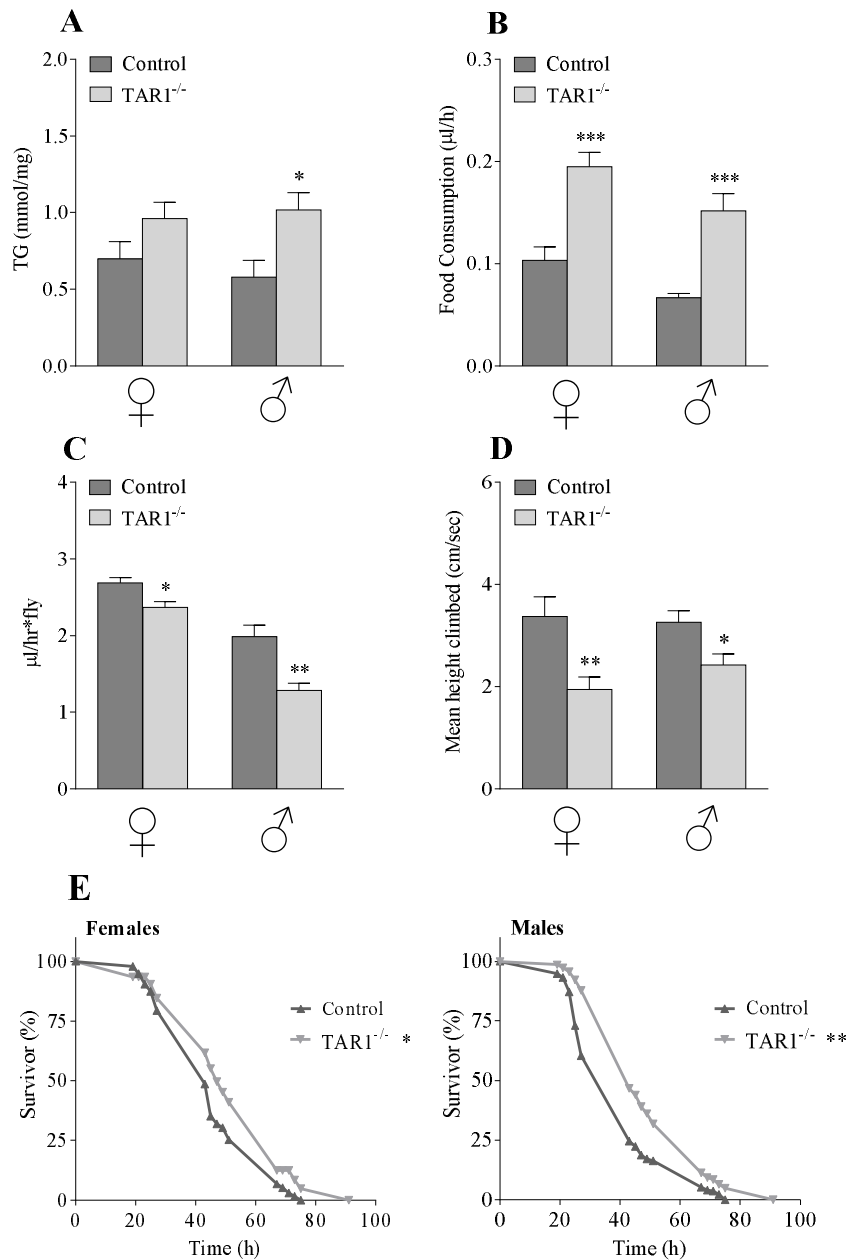

775

776 **Figure 3. Physiological, metabolic and behavioural alterations in flies with an impaired TAR1.** Total  
777 body triglyceride (TG) content (**panel A**), food intake quantification (**panel B**), metabolic rate (**panel C**),  
778 climbing activity measured by RING assay (**panel D**) and starvation resistance (**panel E**) were tested in  
779 control and TAR1<sup>-/-</sup> animals of both sexes. For all experiments, means of at least four independent biological  
780 replicates ± SEM are shown. \*p < .05 \*\*p < .01 \*\*\*p < .005 vs control according to student's *t*-test. In  
781 starvation resistance, statistical analyses were performed using the log-rank test.

782



783

784 **Figure 4.**

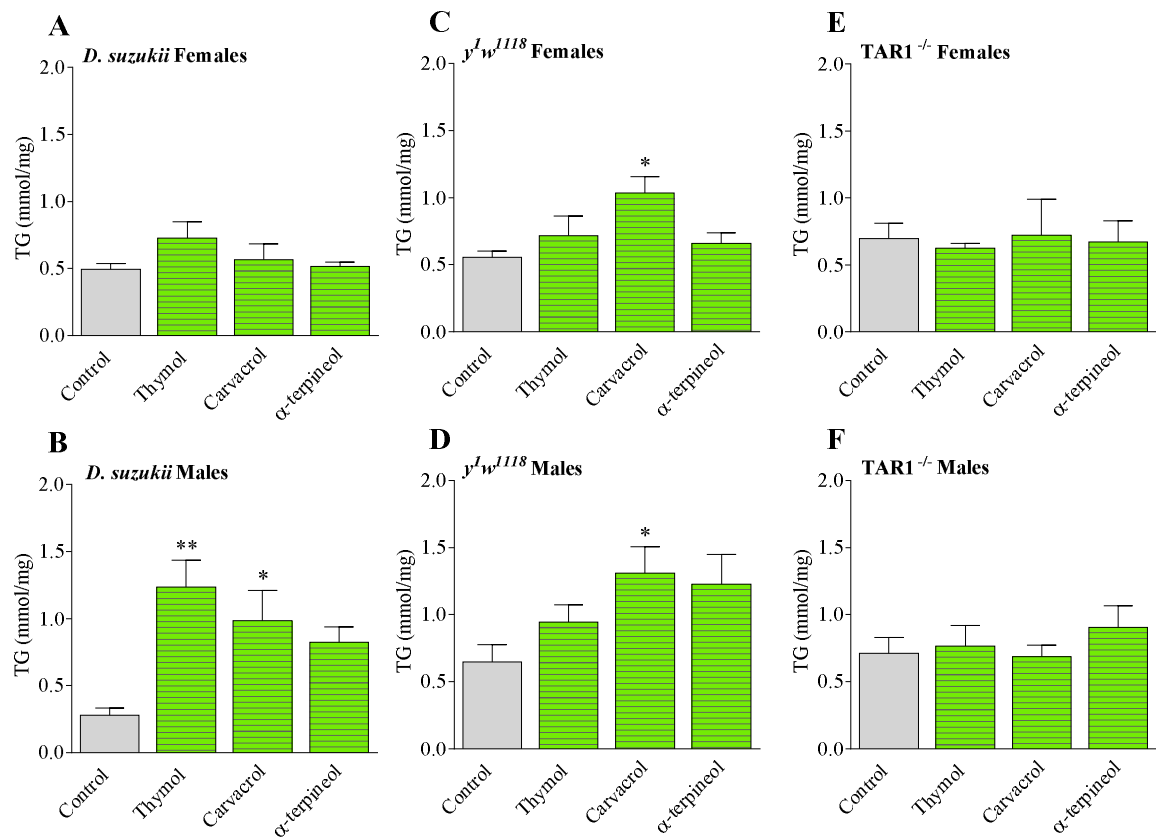

785

786 **Figure 4. Total body triglyceride (TG) content, after 24 h of exposure to monoterpenes, in *D. sukukii***

787 **(panels A and B), *D. melanogaster*  $y^1w^{1118}$  (panels C and D) and *D. melanogaster*  $TAR1^{-/-}$  (panels E and**

788 **F). Data shown are the means  $\pm$  SEM of four independent biological replicates. \*p < .05 \*\*p < .01 vs control**

789 **according to one-way ANOVA followed by Dunnett's test for multiple comparisons.**

790

791

792

793

794

795

796

797

798

799

800

801

802 **Figure 5.**

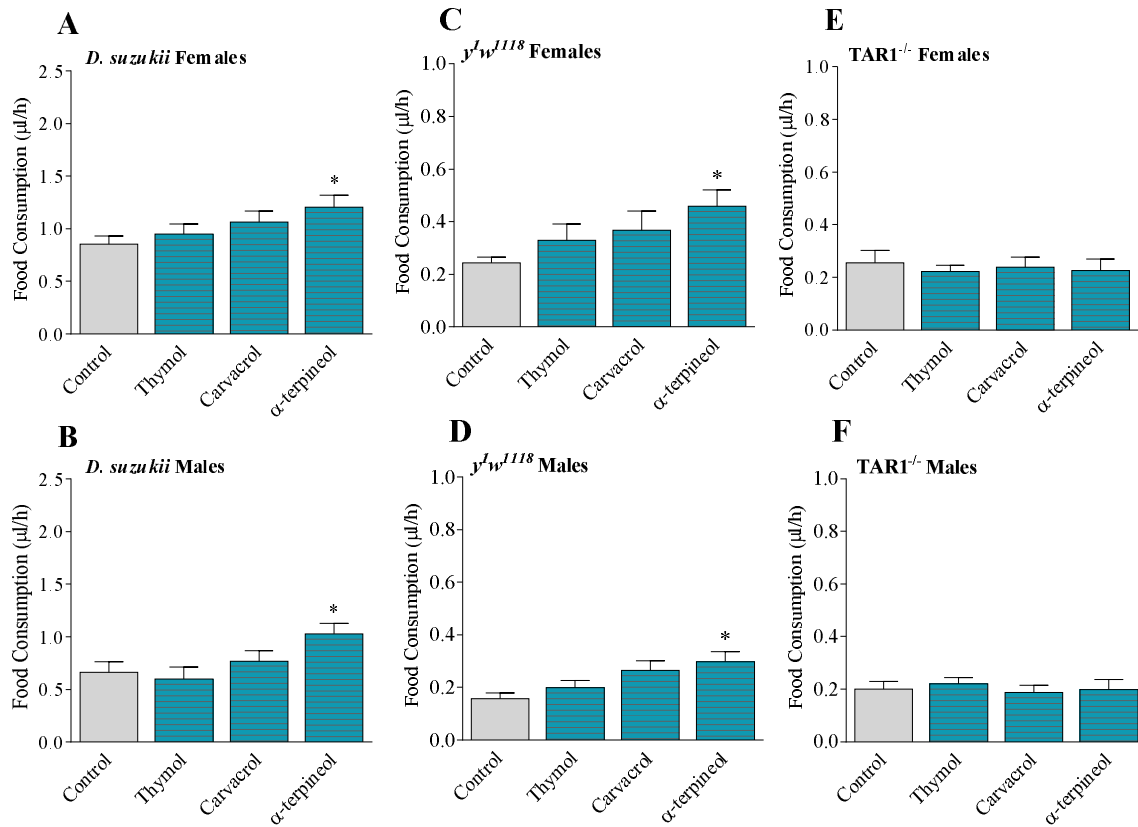

803

804 **Figure 5. Food intake, after 24 h of exposure to monoterpenes, in *D. suzukii* (panels A and B), *D.***  
805 ***melanogaster*  $y^1w^{1118}$  (panels C and D) and *D. melanogaster*  $TAR1^{-/-}$  (panels E and F) measured as µl of**  
806 **diet per hour. Data shown are the means  $\pm$  SEM of five independent biological replicates. \*p < .05 vs**  
807 **control according to one-way ANOVA followed by Dunnett's test for multiple comparisons.**

808

809

810

811

812

813

814

815

816

817

818

819

820 **Figure 6.**

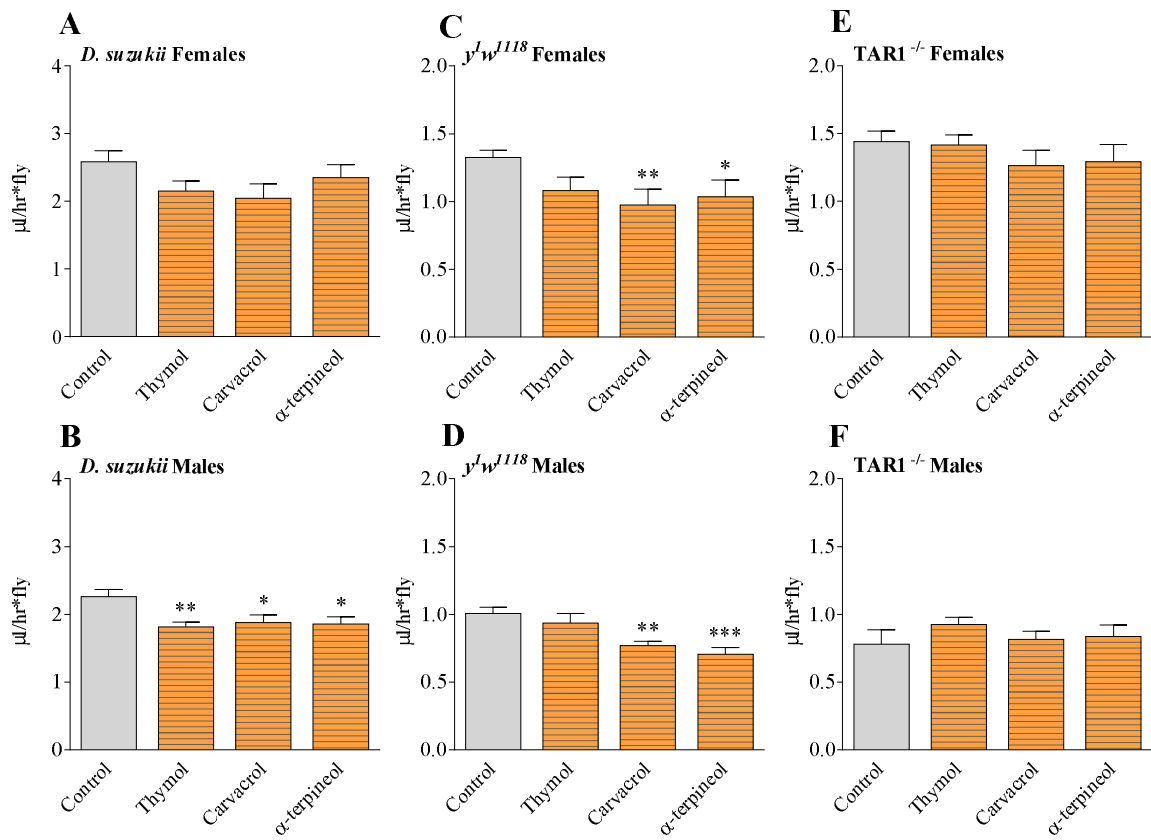

821

822 **Figure 6. Metabolic rate, after 24 h of exposure to monoterpenes, in *D. suzukii* (panels A and B), *D.***  
823 ***melanogaster*  $y^1w^{1118}$  (panels C and D) and *D. melanogaster*  $TAR1^{-/-}$  (panels E and F). Data shown are the**  
824 **means  $\pm$  SEM of five independent biological replicates. \*p < .05 \*\*p < .01 \*\*\*p < .005 vs control according**  
825 **to one-way ANOVA followed by Dunnett's test for multiple comparisons.**

826

827

828

829

830

831

832

833

834

835

836

837

838 **Figure 7.**

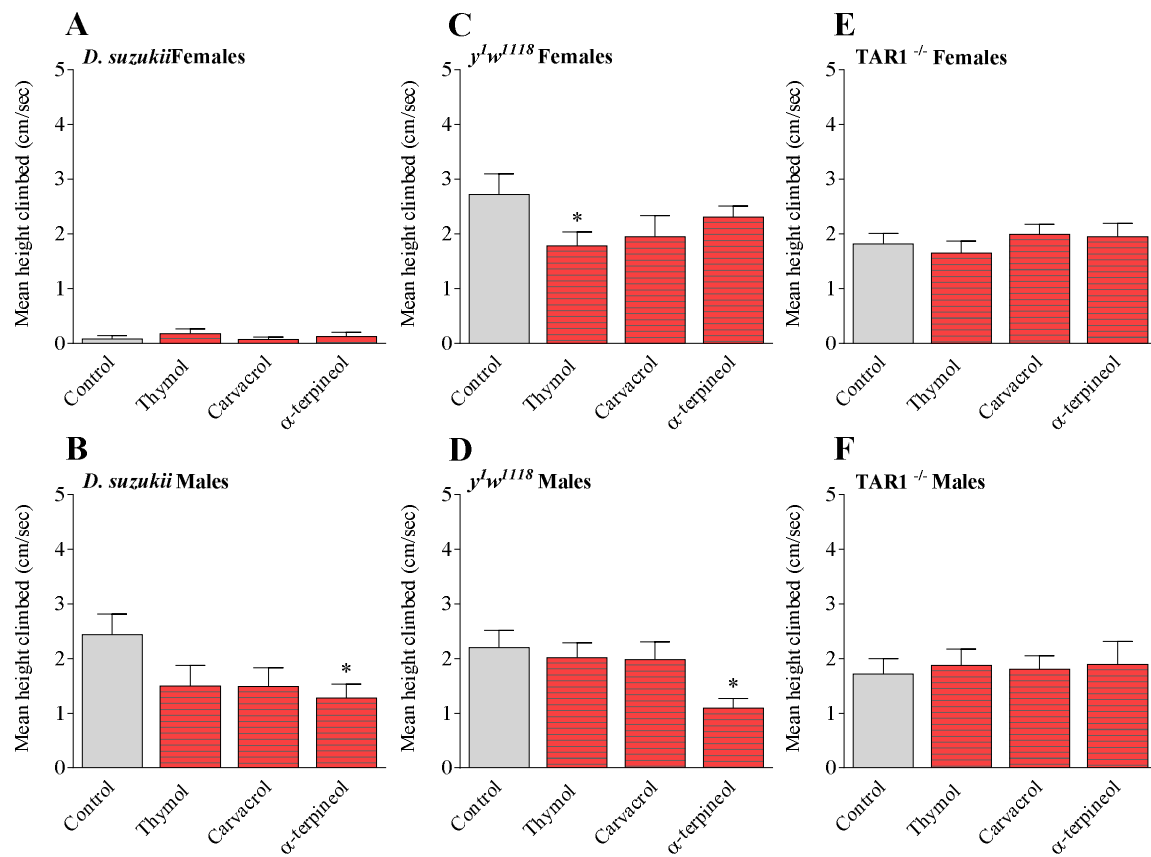

839

840 **Figure 7. RING assay, after 24 h of exposure to monoterpenes, on *D. sukukii* (panels A and B), *D.***  
841 ***melanogaster y<sup>1w1118</sup>* (panels C and D) and *D. melanogaster TAR1<sup>-/-</sup>* (panels E and F). The vertical**  
842 **movement capacity for each insect is expressed in cm per second. Data shown are the means  $\pm$  SEM of five**  
843 **independent biological replicates. \* $p < .05$  vs control according to one-way ANOVA followed by Dunnett's**  
844 **test for multiple comparisons.**

845

846

847

848

849

850

851

852

853

854

855

856 **Figure 8.**

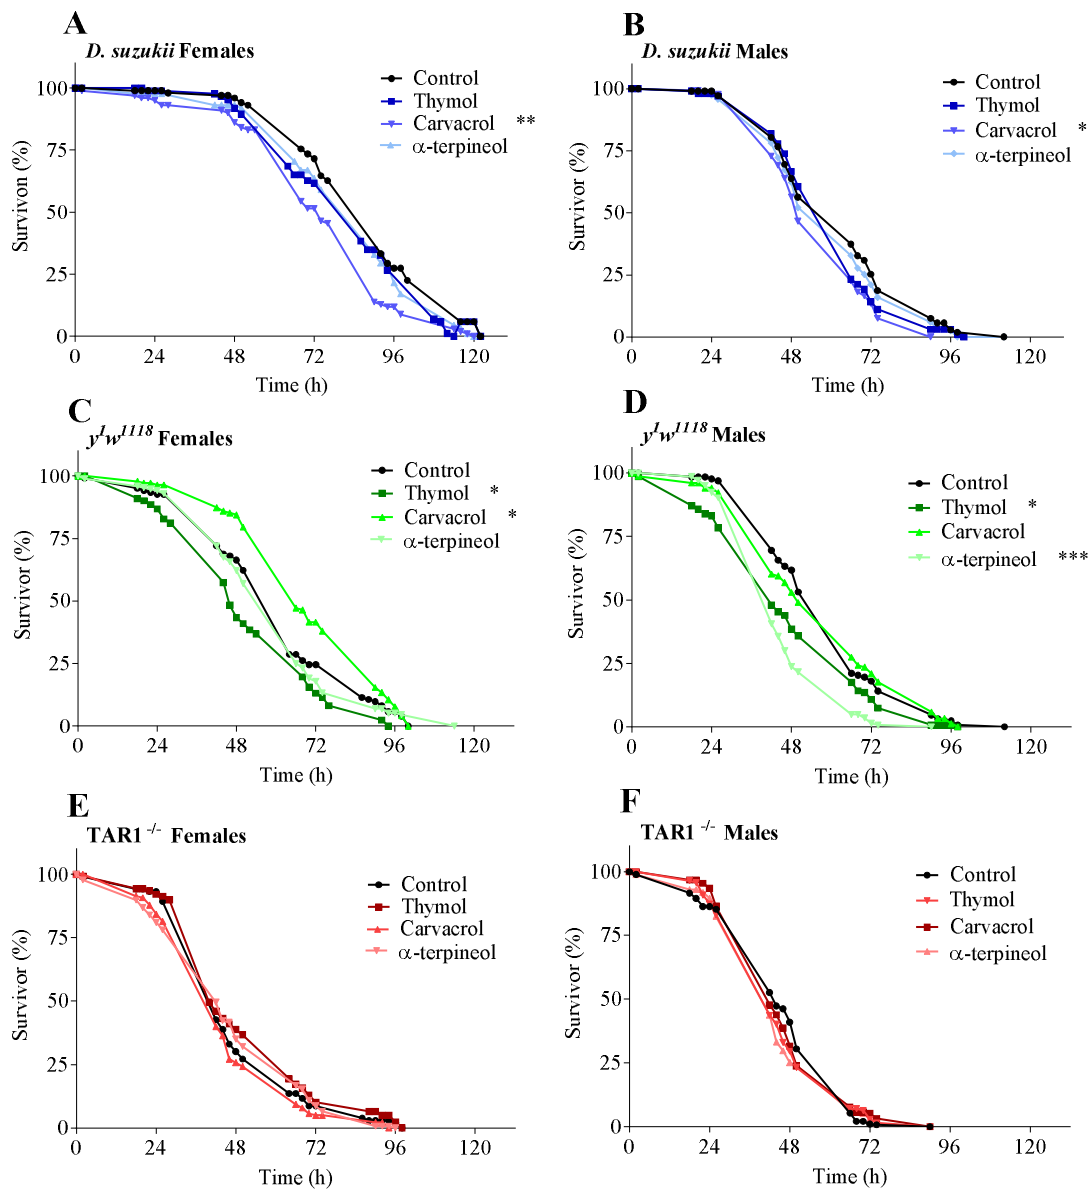

857

858 **Figure 8. Starvation resistance, after 24 h of exposure to monoterpenes, on *D. suzukii* (panels A and B),**

859 ***D. melanogaster y<sup>1</sup>w<sup>1118</sup>* (panels C and D) and *D. melanogaster TAR1<sup>-/-</sup>* (panels E and F). Five**

860 **independent biological replicates were performed with the log-rank test statistical analysis. \*p < .05,**

861 **\*\*p<.01, \*\*\*p<.005 vs control.**
